# Supplementary material for: Chemical Standardization of Milk Thistle (Silybum marianum L.) Extract Using UHPLC-MS/MS and the Method of Standard Addition
Source: PubMed Central journal article supplement — J Am Soc Mass Spectrom. 2024 Jul 2;35(8):1726–32. doi: 10.1021/jasms.4c00125 (PMC11311221; doi:10.1021/jasms.4c00125), 2024-07-02
Supplement: js4c00125_si_001.pdf [file js4c00125_si_001.pdf]

## Supplemental Information

### Chemical Standardization of Milk Thistle (*Silybum marianum* L.) Extract Using UHPLC-MS/MS and the Method of Standard Addition

Ruth N. Muchiri and Richard B. van Breemen\*

Linus Pauling Institute, Department of Pharmaceutical Sciences, College of Pharmacy, Oregon State University, 2900 SW Campus Way, Corvallis, 97331, Oregon, USA.

\*Author to whom correspondence should be addressed:

Linus Pauling Institute and Department of Pharmaceutical Sciences

College of Pharmacy, Oregon State University

2900 SW Campus Way, Corvallis, OR 97331

Tel: 541-737-5078

FAX: 541-737-5077

Email: [richard.vanbreemen@oregonstate.edu](mailto:richard.vanbreemen@oregonstate.edu)

## Analysis of milk thistle (*Silybum marianum*) extract using high-resolution UHPLC-MS

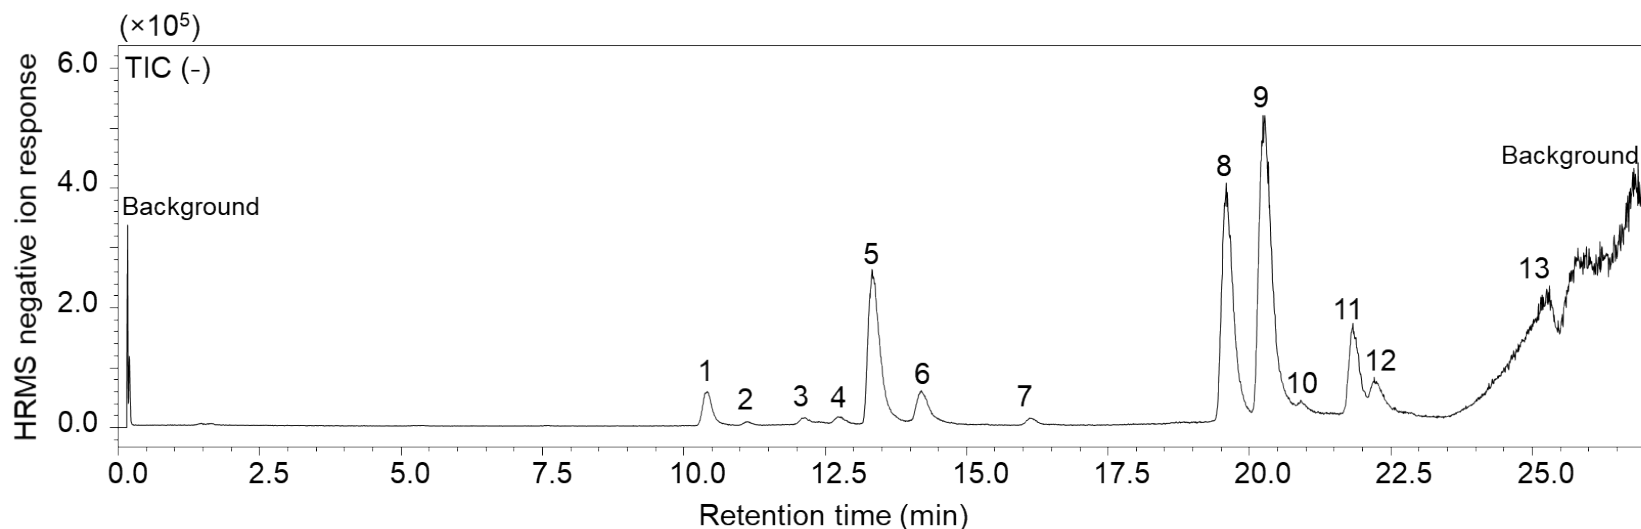

**Figure 1.** Total ion chromatogram of milk thistle extract (10  $\mu\text{g/mL}$ ) analyzed on a Shimadzu 9030 QToF mass spectrometer with negative ion electrospray. As described in the Methods section, reversed phase UHPLC gradient elution was used from water to methanol (both solvents containing 0.1% formic acid). Peak assignments are shown in **Supplemental Table 1**.

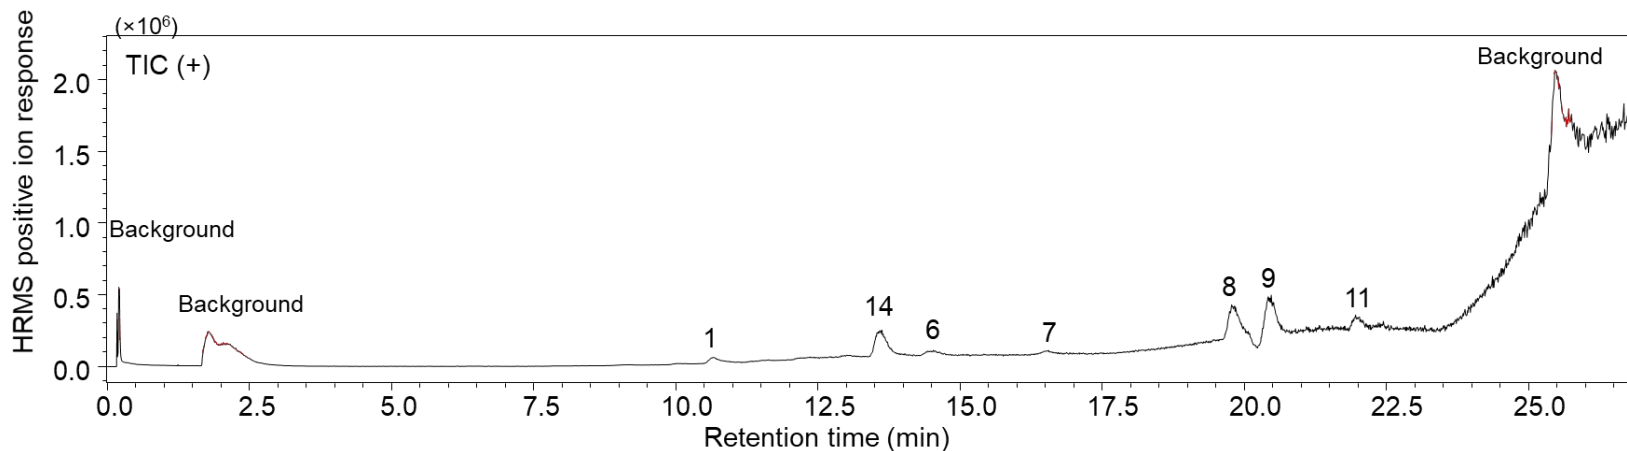

**Figure 2.** Total ion chromatogram of milk thistle extract (10  $\mu\text{g/mL}$ ) analyzed on a Shimadzu 9030 UHPLC-QToF mass spectrometer with positive ion electrospray. Reversed phase UHPLC gradient elution was used as in **Figure 1** above. Peak assignments are shown in **Supplemental Table 1**. Note that the retention times of the analytes in this positive ion electrospray chromatogram are shifted by 0.24 min compared with the corresponding negative ion chromatogram in **Figure 1** due to variations in chromatographic conditions. The  $\text{d}_4$ -daidzein internal standard was used to verify the shift in the retention time. (See Table 1, Peak 7).

**Table 1.** Peak assignments for the high-resolution UHPLC-MS analyses of milk thistle extract (*Silybum marianum*) shown in **Supplemental Figures 1 and 2.**

| Peak number | Retention time (min) | Measured mass ( <i>m/z</i> )<br>(-) top<br>(+) bottom | $\Delta M$ (ppm)<br>(-) top<br>(+) bottom | Compound<br>Molecular Formula<br>Confidence          | Chemical Structure                                                                    | Comments                                                                                                                                                                        |
|-------------|----------------------|-------------------------------------------------------|-------------------------------------------|------------------------------------------------------|---------------------------------------------------------------------------------------|---------------------------------------------------------------------------------------------------------------------------------------------------------------------------------|
| 1           | 10.42                | 303.0485<br>305.0554                                  | 8.2<br>1.3                                | Taxifolin<br>$C_{15}H_{12}O_7$<br>Reference standard | 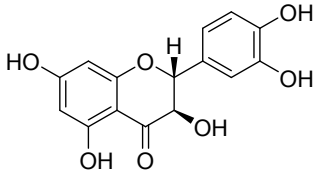   | HRMS supports molecular formula. MS/MS supports structure via reference standard. Retention time matches that of reference standard.                                            |
| 2           | 11.14                | 303.0485<br>-                                         | 8.2<br>-                                  | Taxifolin isomer<br>$C_{15}H_{12}O_7$<br>Tentative   |    | HRMS supports molecular formula. MS/MS supports structure through comparison of taxifolin major fragment ion of <i>m/z</i> 125. The stereochemical configuration is unknown.    |
| 3           | 12.13                | 287.0538<br>-                                         | 8.0<br>-                                  | Eriodictyol<br>$C_{15}H_{12}O_6$<br>Tentative        |   | HRMS supports molecular formula of taxifolin minus a hydroxyl group.(eriodictyol) MS/MS supports structure through comparison of taxifolin major fragment ion of <i>m/z</i> 125 |
| 4           | 12.76                | 481.1101<br>-                                         | 8.1<br>-                                  | Neusilychristin<br>$C_{25}H_{22}O_{10}$<br>Tentative |  | Eluting shortly before silychristin A, neusilychristin A, the MS/MS data matches that of silychristin [1].                                                                      |

| Peak number | Retention time (min) | Measured mass ( <i>m/z</i> )<br>(-) top<br>(+) bottom | $\Delta M$ (ppm)<br>(-) top<br>(+) bottom | Compound<br>Molecular Formula<br>Confidence                                  | Chemical Structure                                                                    | Comments                                                                                                                                  |
|-------------|----------------------|-------------------------------------------------------|-------------------------------------------|------------------------------------------------------------------------------|---------------------------------------------------------------------------------------|-------------------------------------------------------------------------------------------------------------------------------------------|
| 5           | 13.35                | 481.1102<br>-                                         | 7.9<br>-                                  | Silychristin<br>$C_{25}H_{22}O_{10}$<br>Reference standard                   | 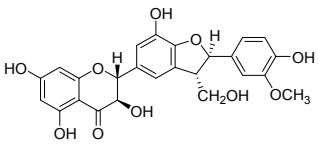   | HRMS supports molecular formula.<br>MS/MS supports structure via reference standard.<br>Retention time matches that of reference standard |
| 6           | 14.20                | 481.1101<br>-                                         | 8.1<br>-                                  | Silydianin<br>$C_{25}H_{22}O_{10}$<br>Reference standard                     |    | HRMS supports molecular formula.<br>MS/MS supports structure via reference standard.<br>Retention time matches that of reference standard |
| 7           | 16.15<br>16.40       | 257.0735<br>259.0899                                  | 8.5<br>1.2                                | $d_4$ -Daidzein internal standard<br>$C_{15}H_6D_4O_4$<br>Reference standard |    | HRMS supports molecular formula.<br>MS/MS supports structure via reference standard.<br>Retention time matches that of reference standard |
| 8           | 19.60                | 481.1102<br>483.1283                                  | 7.9<br>0.41                               | Silybin A<br>$C_{25}H_{22}O_{10}$<br>Reference standard                      |  | HRMS supports molecular formula.<br>MS/MS supports structure via reference standard.<br>Retention time matches that of reference standard |
| 9           | 20.27                | 481.1103<br>483.1284                                  | 7.7<br>0.2                                | Silybin B<br>$C_{25}H_{22}O_{10}$<br>Reference standard                      |  | HRMS supports molecular formula.<br>MS/MS supports structure via reference standard.<br>Retention time matches that of reference standard |

| Peak number | Retention time (min) | Measured mass ( <i>m/z</i> )<br>(-) top<br>(+) bottom | $\Delta M$ (ppm)<br>(-) top<br>(+) bottom | Compound<br>Molecular Formula<br>Confidence                                                   | Chemical Structure                                                                    | Comments                                                                                                                                                                                                       |
|-------------|----------------------|-------------------------------------------------------|-------------------------------------------|-----------------------------------------------------------------------------------------------|---------------------------------------------------------------------------------------|----------------------------------------------------------------------------------------------------------------------------------------------------------------------------------------------------------------|
| 10          | 20.93                | 481.1102<br>-                                         | 7.9<br>-                                  | A silymarin isomer,<br>likely 2,3- <i>cis</i> -silybin A<br>$C_{25}H_{22}O_{10}$<br>Tentative | 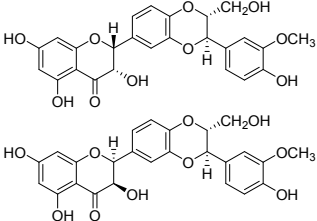   | Based on structural similarity, the suggested silybin isomer is 2,3- <i>cis</i> -silybin A, which has been reported [1]. The HRMS data supports a silybin isomer and the MS/MS matches that of other silybins. |
| 11          | 21.85                | 481.1103<br>483.1254                                  | 7.7<br>6.4                                | Isosilybin A<br>$C_{25}H_{22}O_{10}$<br>Reference standard                                    |    | HRMS supports molecular formula.<br>MS/MS supports structure via reference standard.<br>Retention time matches that of reference standard                                                                      |
| 12          | 22.26                | 481.1102<br>-                                         | 7.9<br>-                                  | Isosilybin B<br>$C_{25}H_{22}O_{10}$<br>Reference standard                                    |    | HRMS supports molecular formula.<br>MS/MS supports structure via reference standard.<br>Retention time matches that of reference standard                                                                      |
| 13          | 25.38                | 479.0948<br>-                                         | 7.5                                       | 2,3-Dehydrosilybin B<br>$C_{25}H_{20}O_{10}$<br>Reference standard                            |  | HRMS supports molecular formula.<br>MS/MS supports structure via reference standard.<br>Retention time matches that of reference standard                                                                      |
| 14          | 13.59                | -<br>453.1176                                         | -<br>0.88                                 | In source fragment of<br>silychristin<br>$C_{24}H_{20}O_9$<br>Tentative                       |  | Common fragment ion for silybins and isosilybins. The retention time suggests an in source fragment ion of silychristin. Fragmentation data of silychristin match literature data [2]                          |

### HRMS and MS/MS of peaks in the milk thistle extract chromatograms in Figures 1 and 2

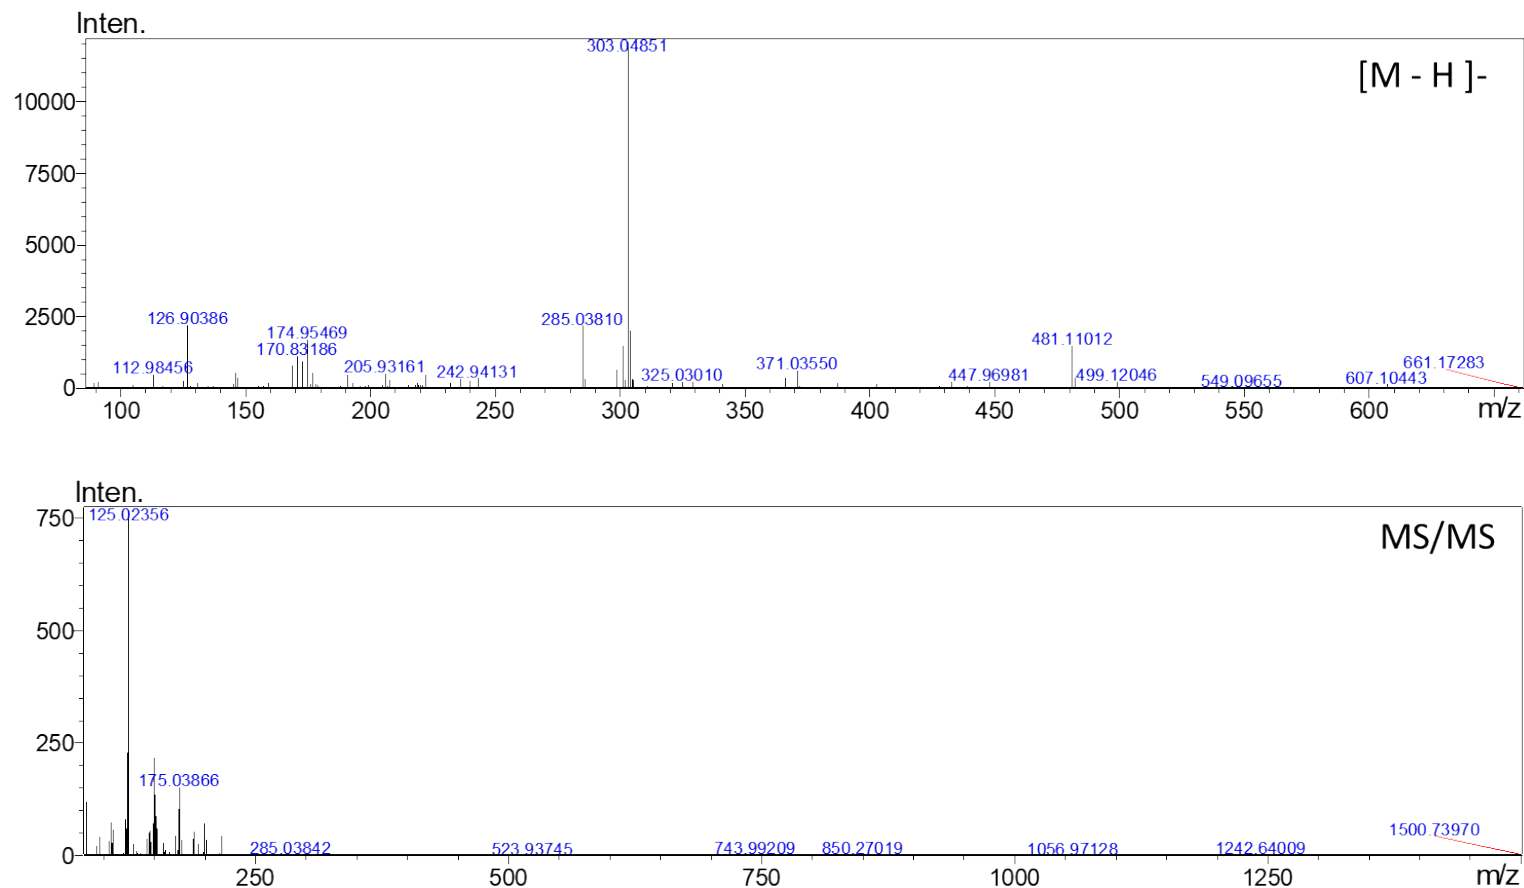

**Figure 3.** Negative ion electrospray HRMS (top panel) and product ion tandem mass spectrum (bottom panel) of peak 1 (taxifolin; [M-H]<sup>-</sup>) of *m/z* 303.04854 eluting at 10.42 min

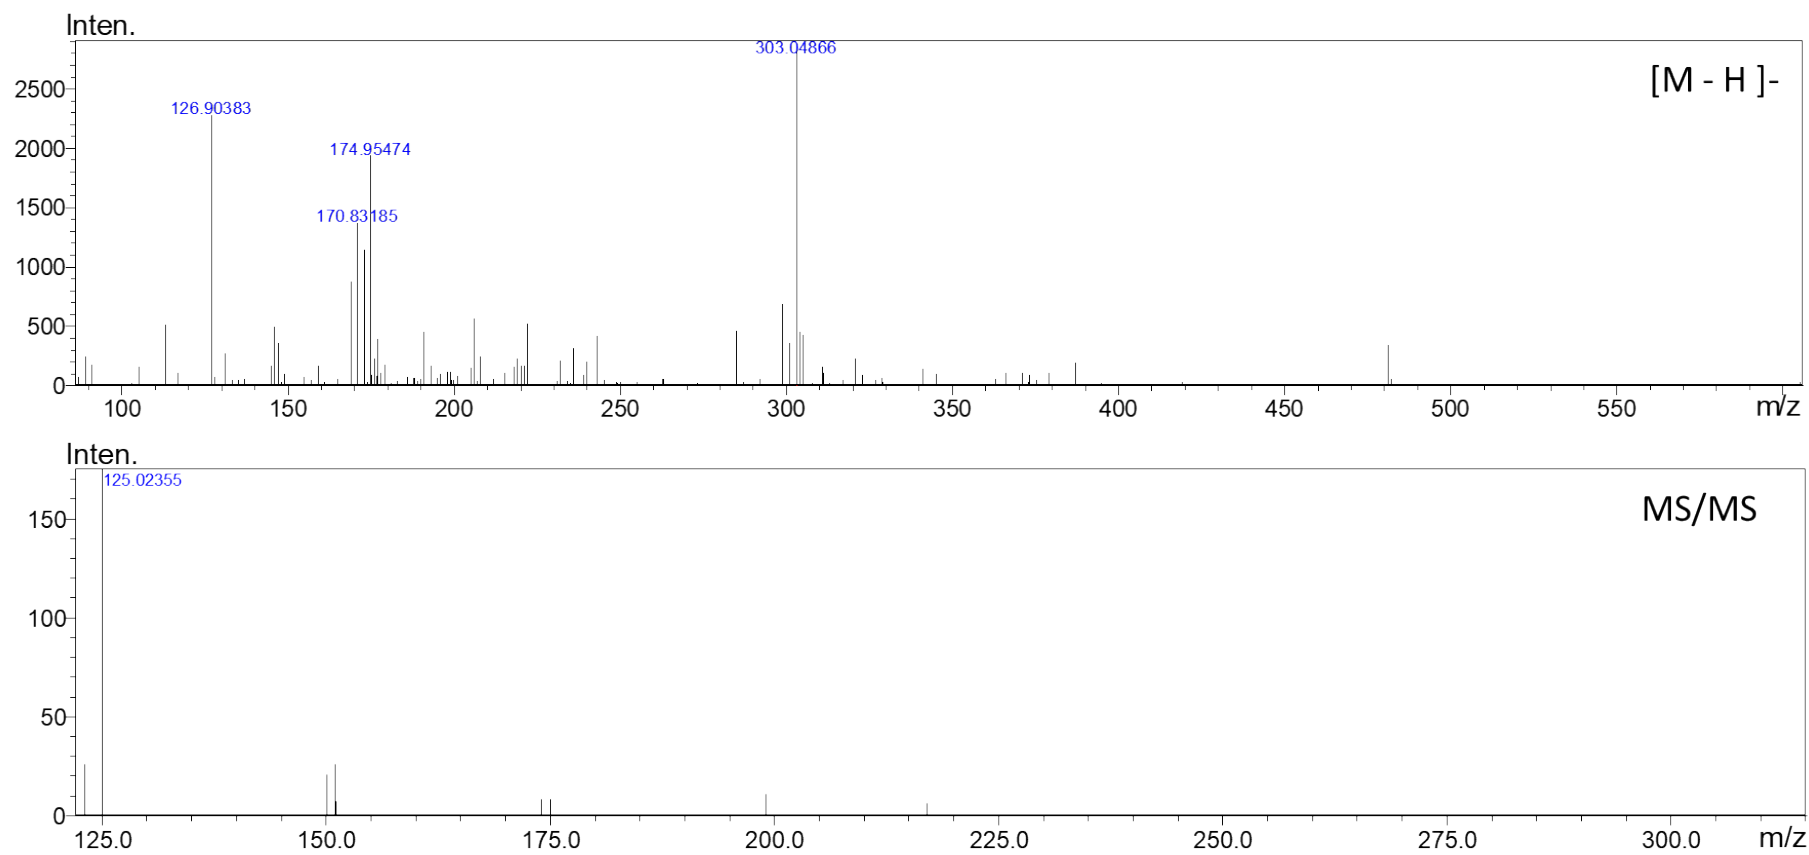

**Figure 4.** Negative ion electrospray HRMS (top panel) and product ion tandem mass spectrum (bottom panel) of peak 2 (taxifolin isomer; [M-H]<sup>-</sup>) of *m/z* 303.04854 eluting at 11.14 min



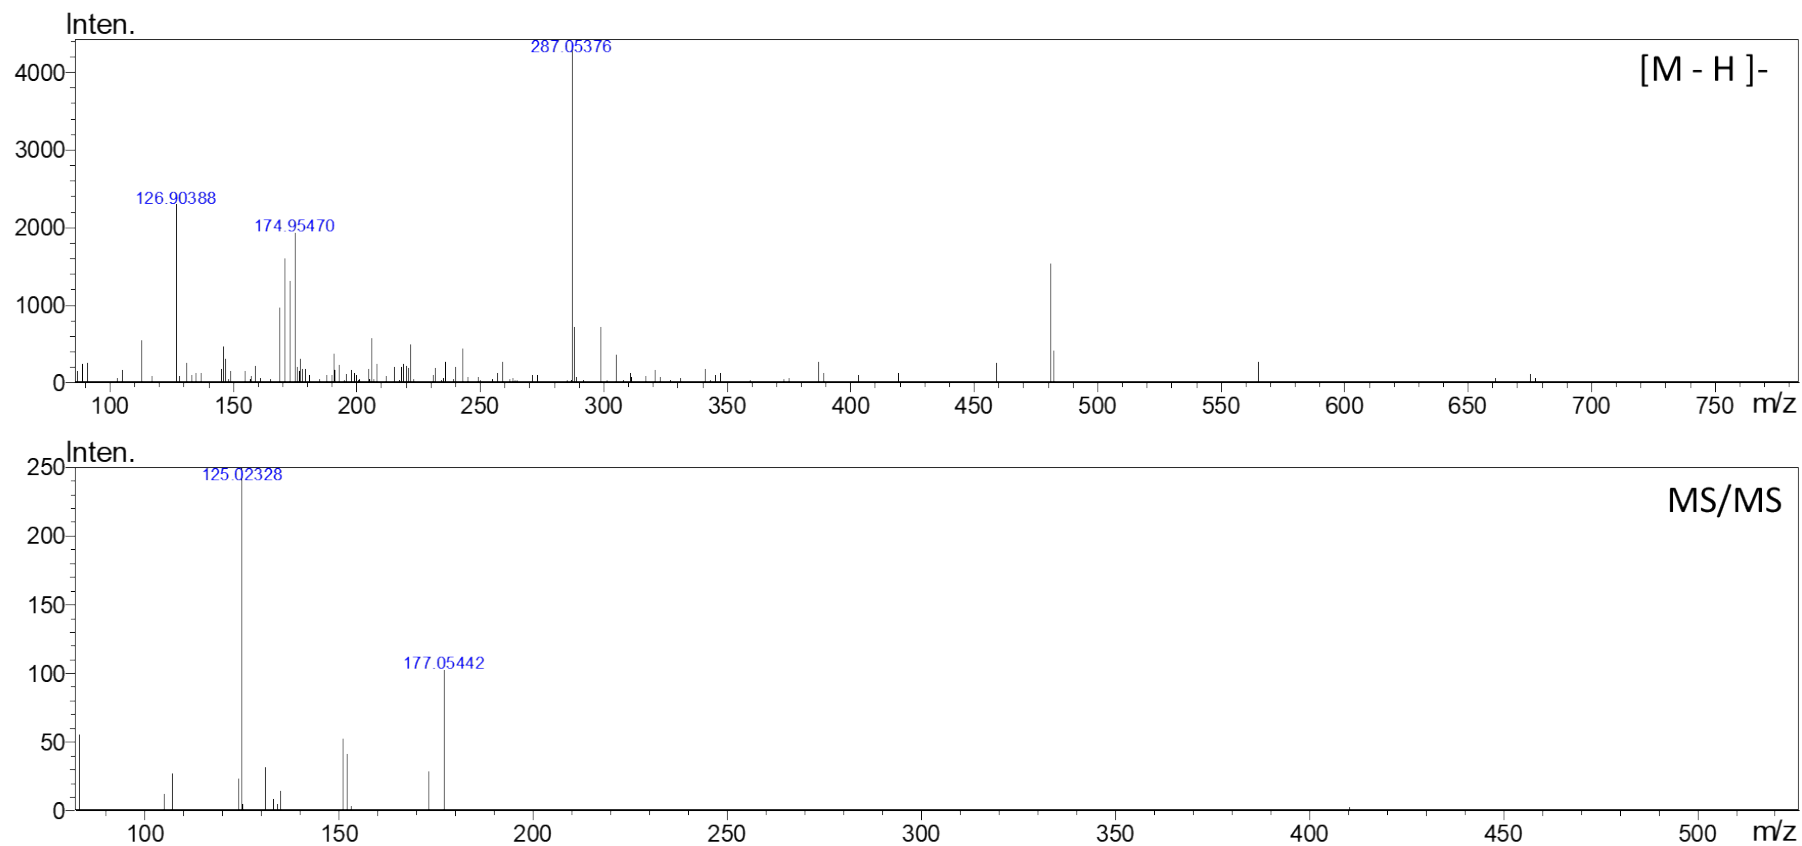

**Figure 5.** Negative ion electrospray HRMS (top panel) and product ion tandem mass spectrum of peak 3 (probably eriodictyol; [M-H]<sup>-</sup>) of *m/z* 287.0538 eluting at 12.13 min

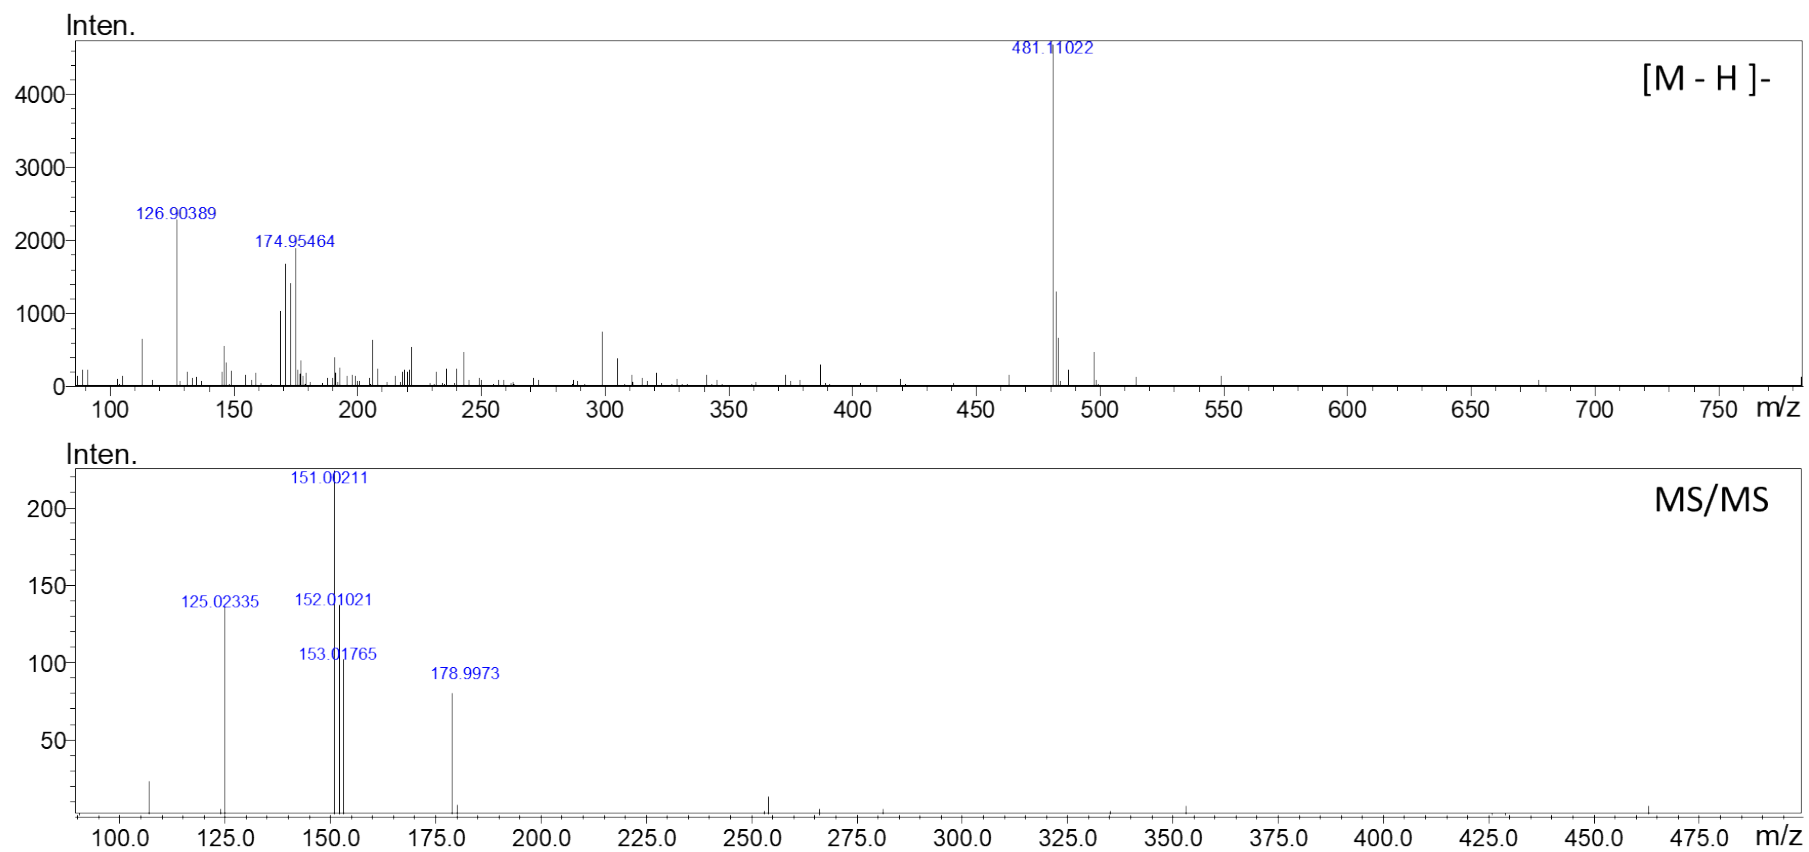

**Figure 6.** Negative ion electrospray HRMS (top panel) and product ion tandem mass spectrum of peak 4 (neusilychristin;  $[M-H]^-$ ) of  $m/z$  481.1101 eluting at 12.76 min

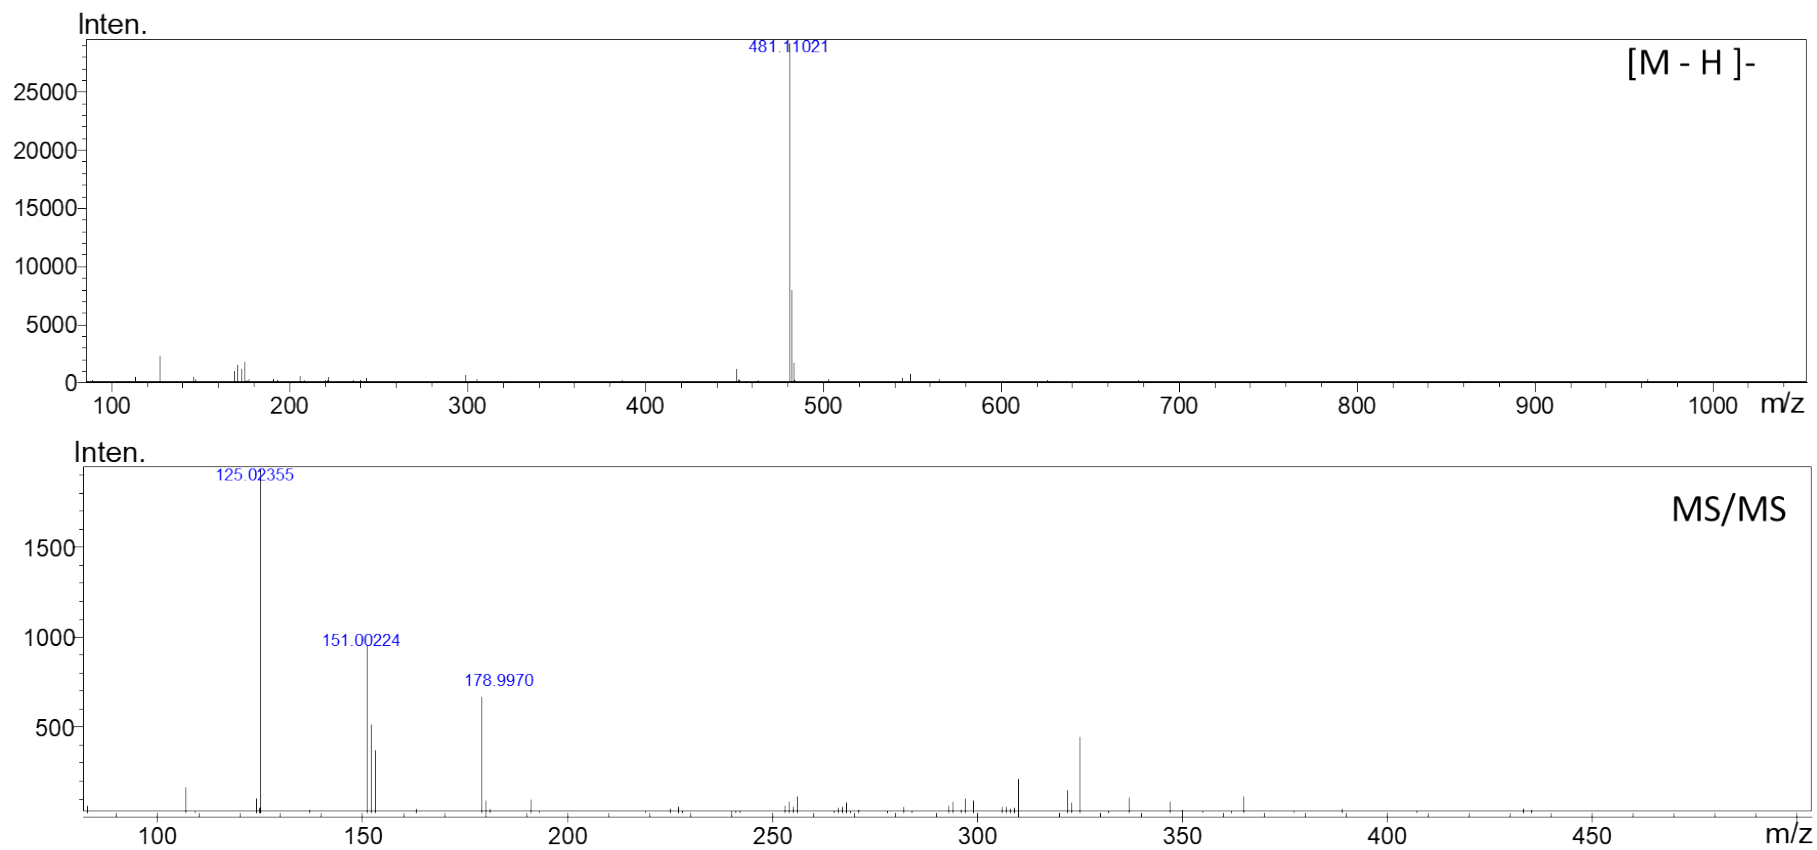

**Figure 7.** Negative ion electrospray HRMS (top panel) and product ion tandem mass spectrum of peak 5 (silychristin;  $[M-H]^-$ ) of  $m/z$  481.1102 eluting at 13.35 min

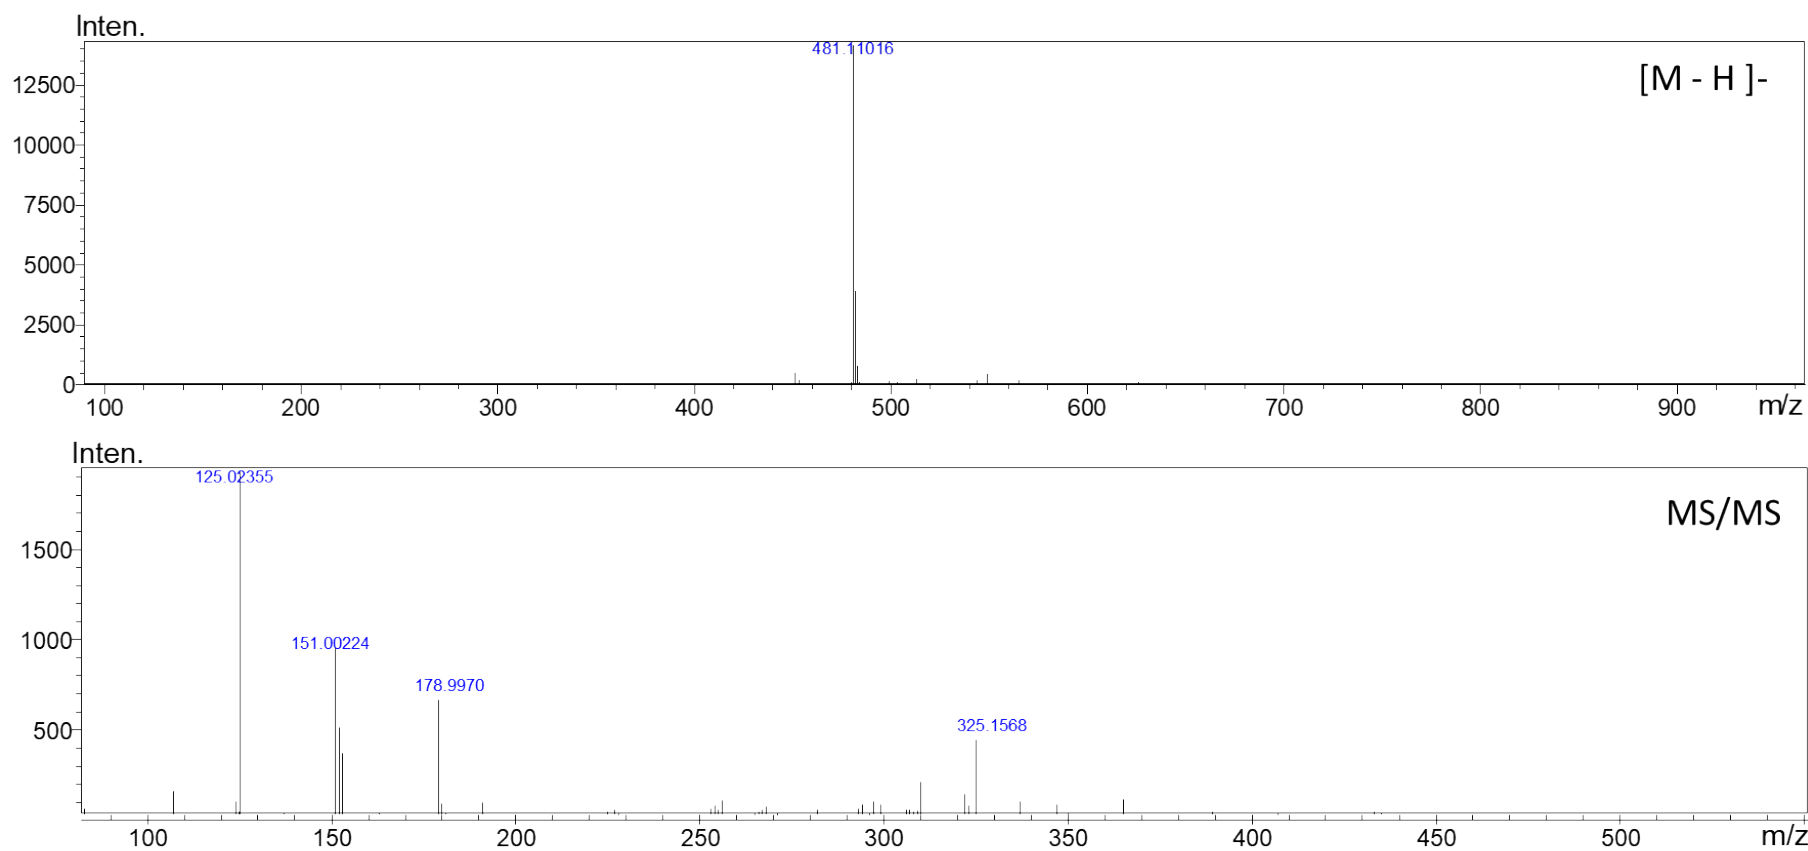

**Figure 8.** Negative ion electrospray HRMS (top panel) and product ion tandem mass spectrum of peak 6 (silydianin;  $[M-H]^-$ ) of  $m/z$  481.1101 eluting at 14.20 min

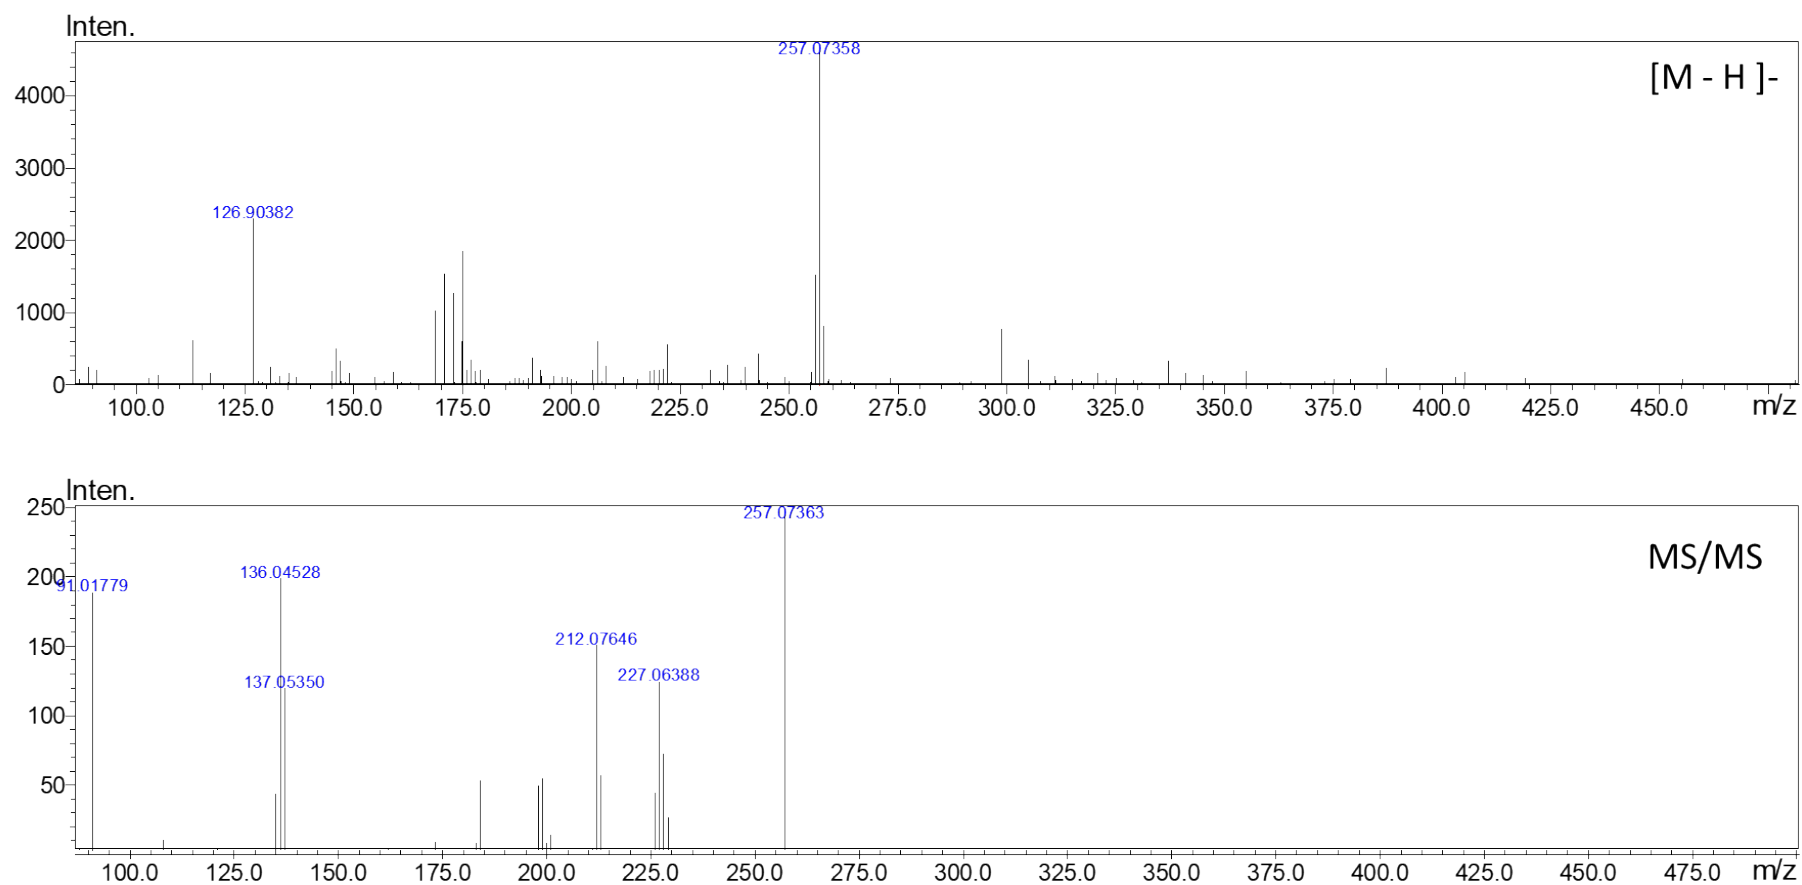

**Figure 9.** Negative ion electrospray HRMS (top panel) and product ion tandem mass spectrum of peak 7 (internal standard, d<sub>4</sub>-daidzein; [M-H]<sup>-</sup>) of m/z 257.0735 eluting at 16.15 min

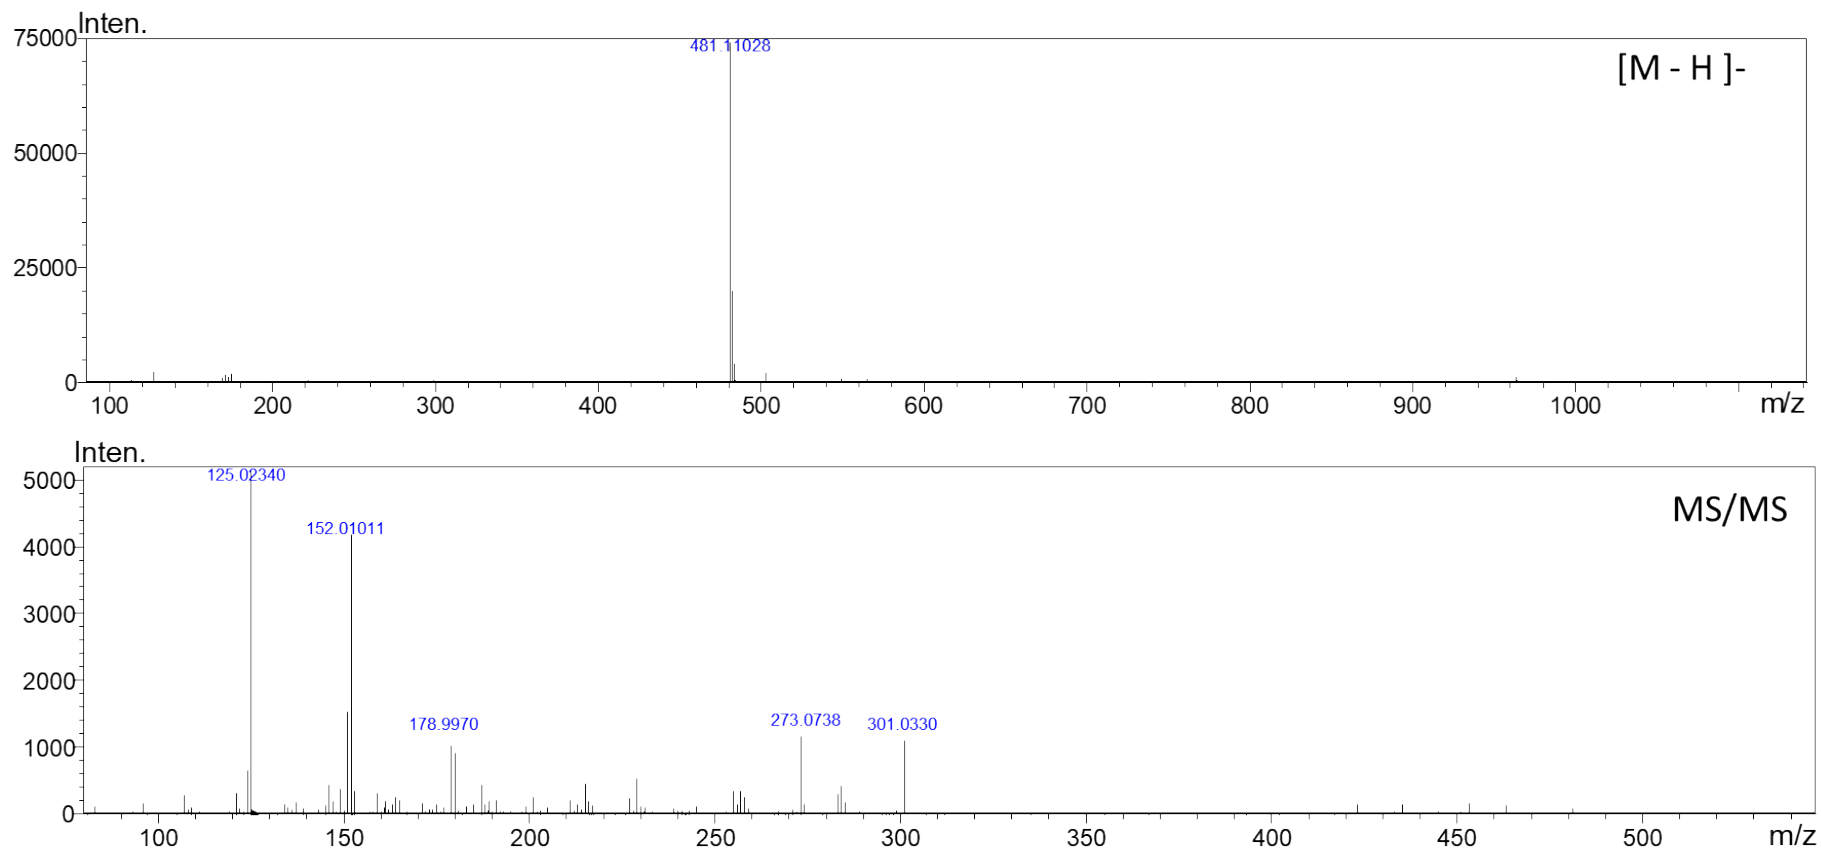

**Figure 10.** Negative ion electrospray HRMS (top panel) and product ion tandem mass spectrum of peak 8 (silybin A; [M-H]<sup>-</sup>) of *m/z* 481.1102 eluting at 19.60 min

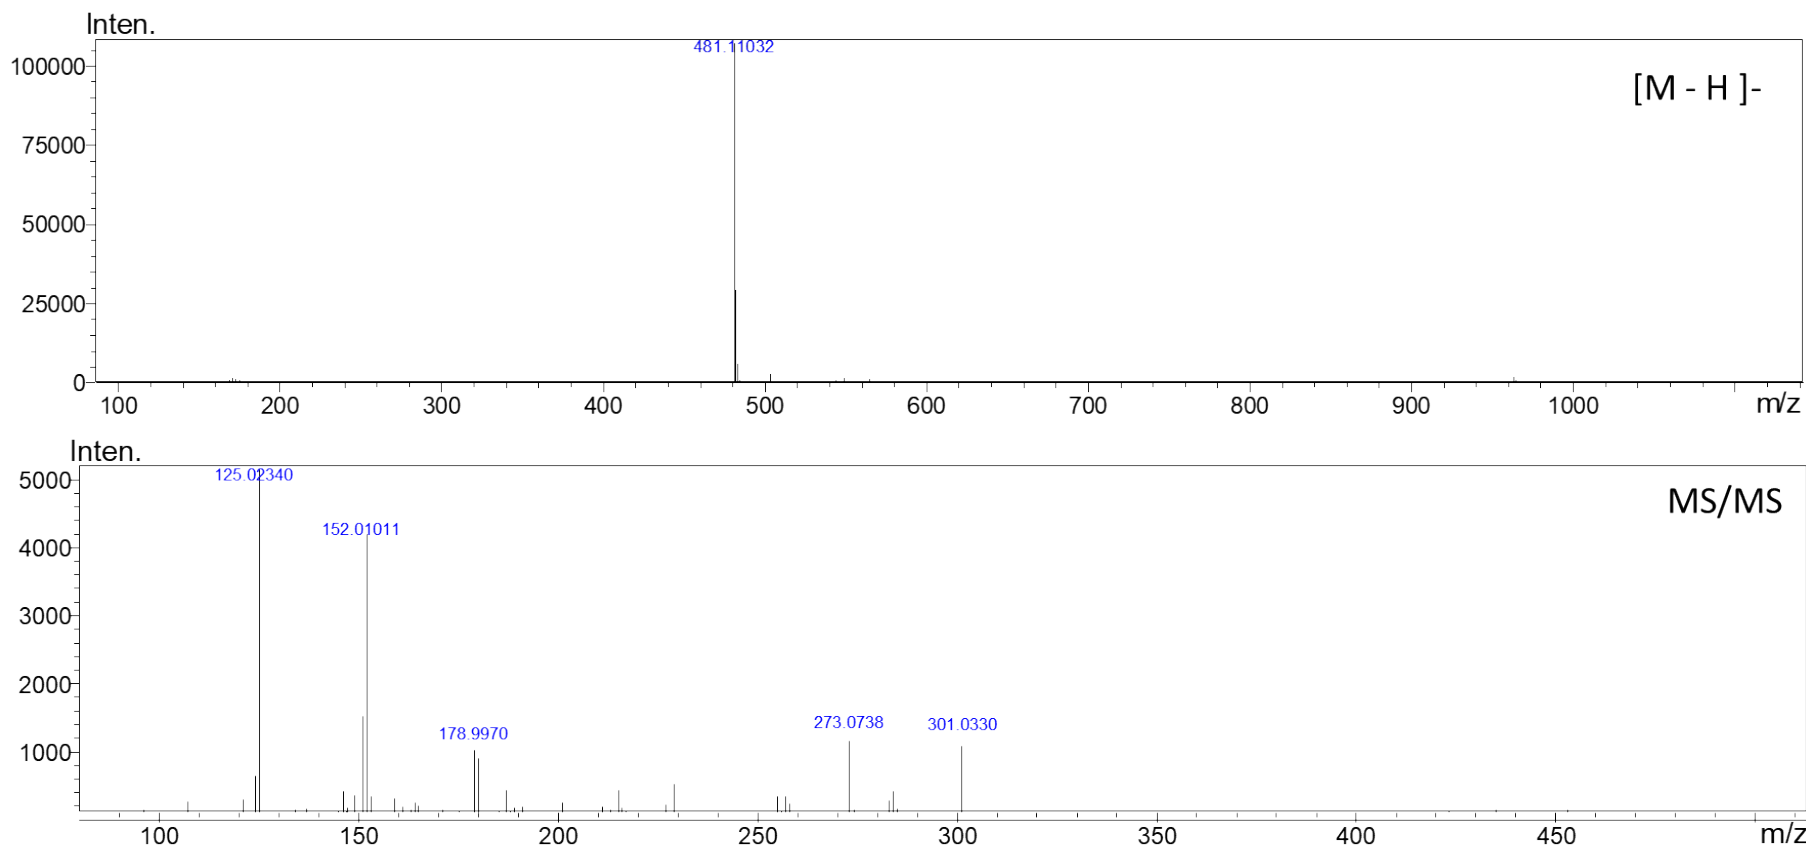

**Figure 11.** Negative ion electrospray HRMS (top panel) and product ion tandem mass spectrum of peak 9 (silybin B; [M-H]<sup>-</sup>) of  $m/z$  481.1103 eluting at 20.27 min

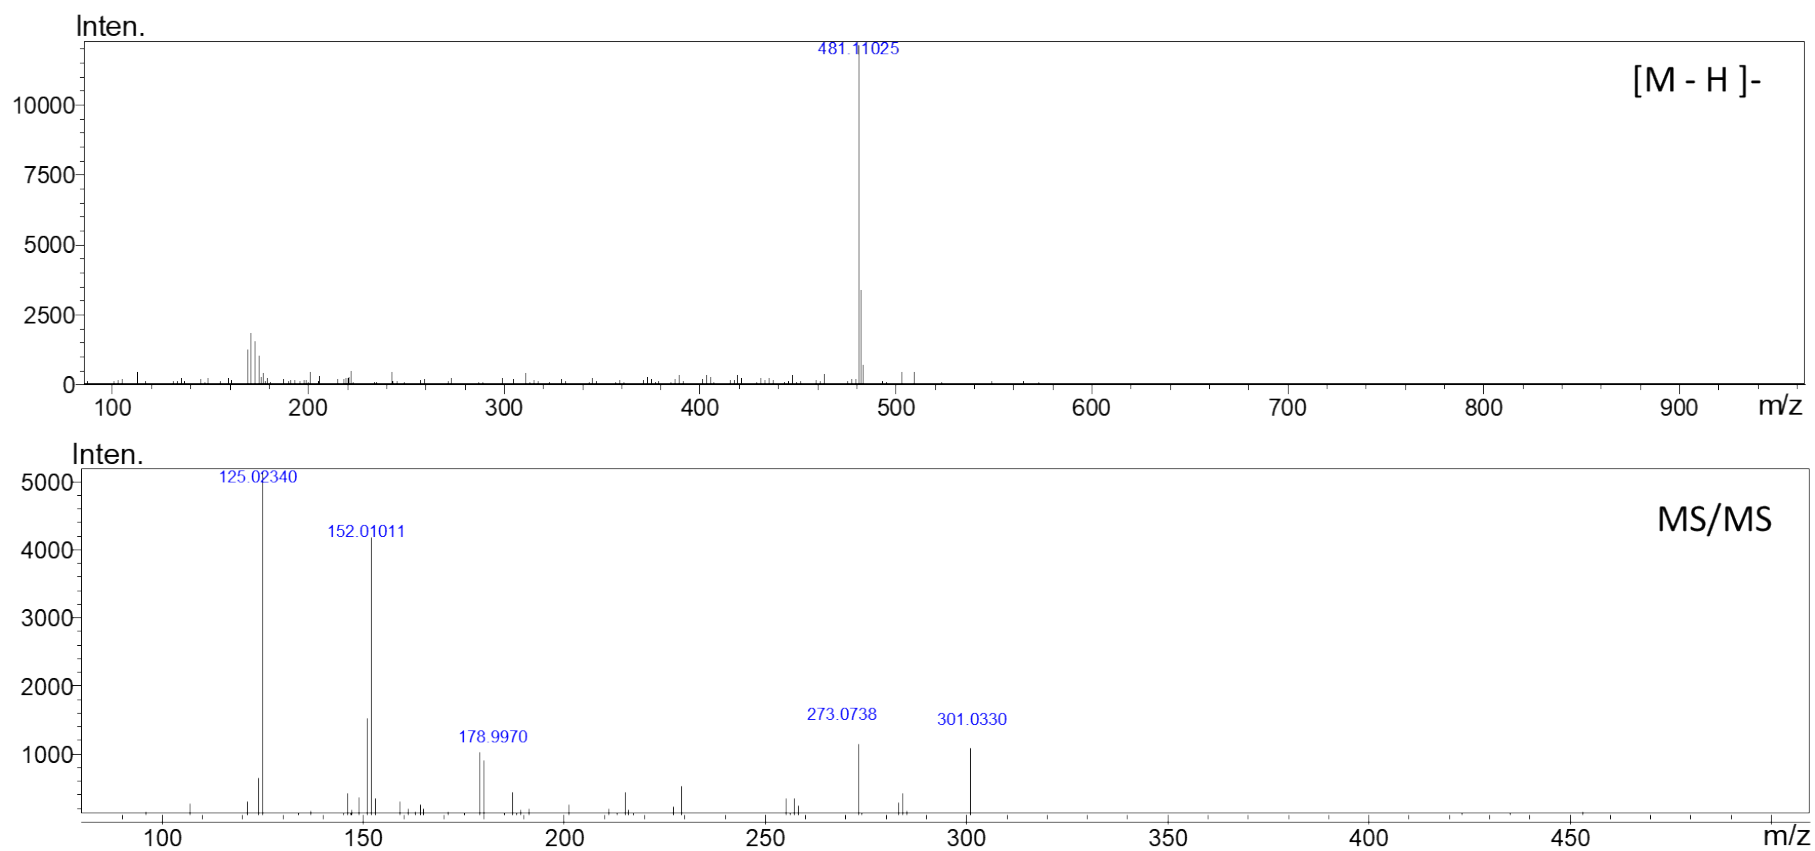

**Figure 12.** Negative ion electrospray HRMS (top panel) and product ion tandem mass spectrum of peak 10 (silymarin isomer, likely 2,3-cis-silybin A;  $[M-H]^-$ ) of  $m/z$  481.1102 eluting at 20.93 min



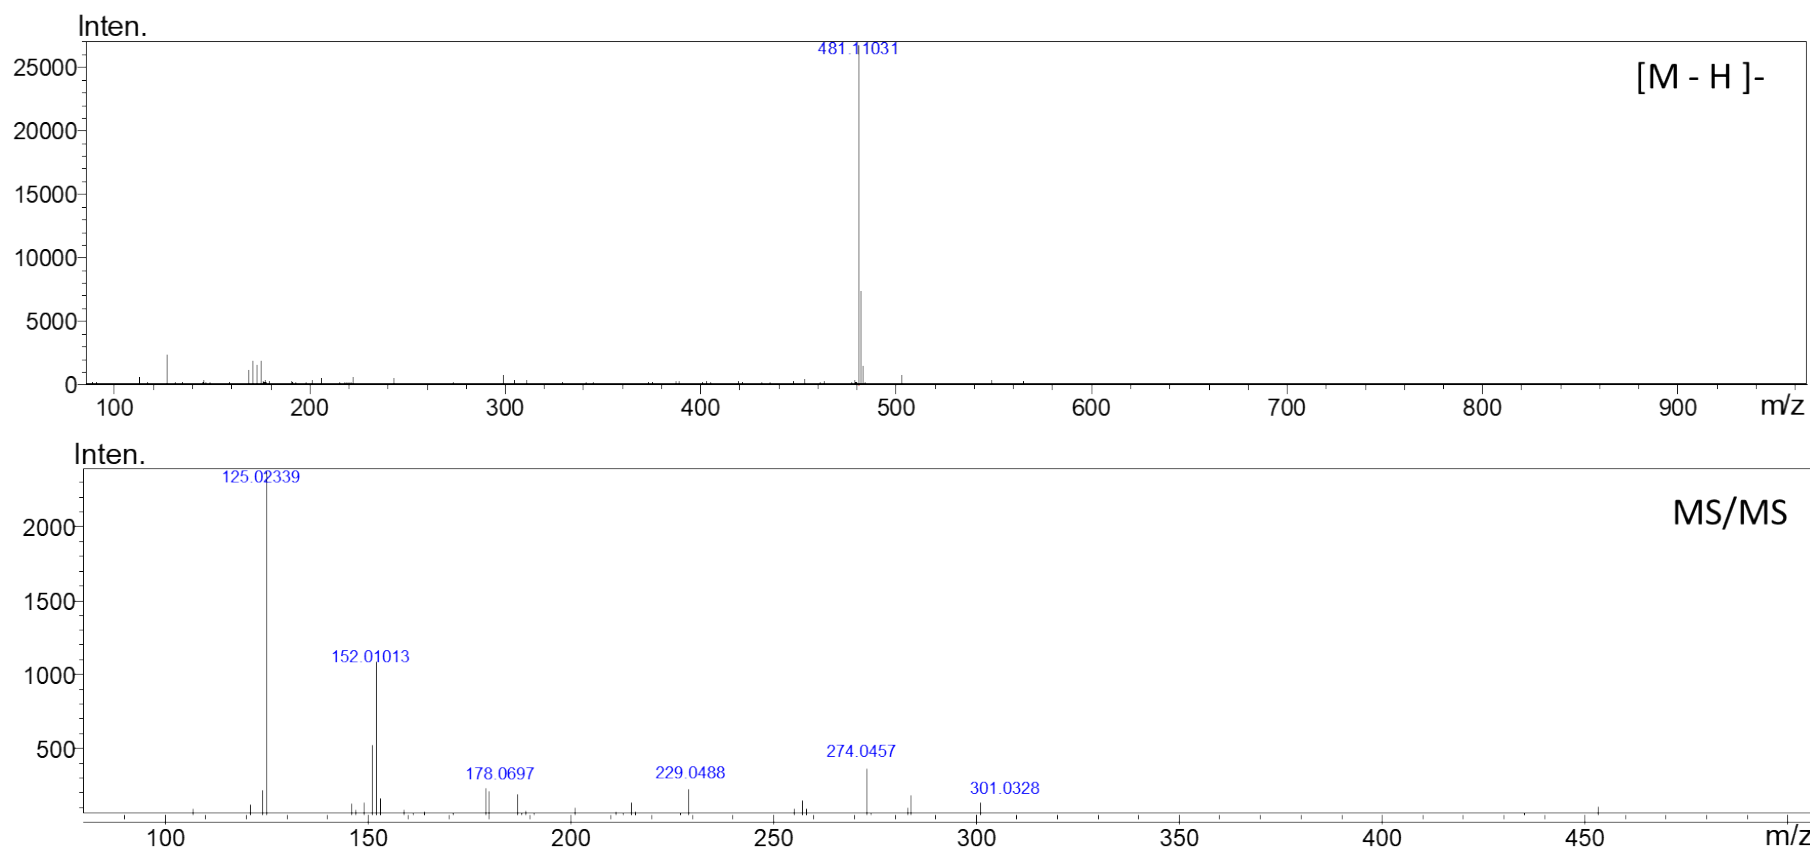

**Figure 13.** Negative ion electrospray HRMS (top panel) and product ion tandem mass spectrum of peak 11 (isosilybin A;  $[M-H]^-$ ) of  $m/z$  481.1103 eluting at 21.85 min

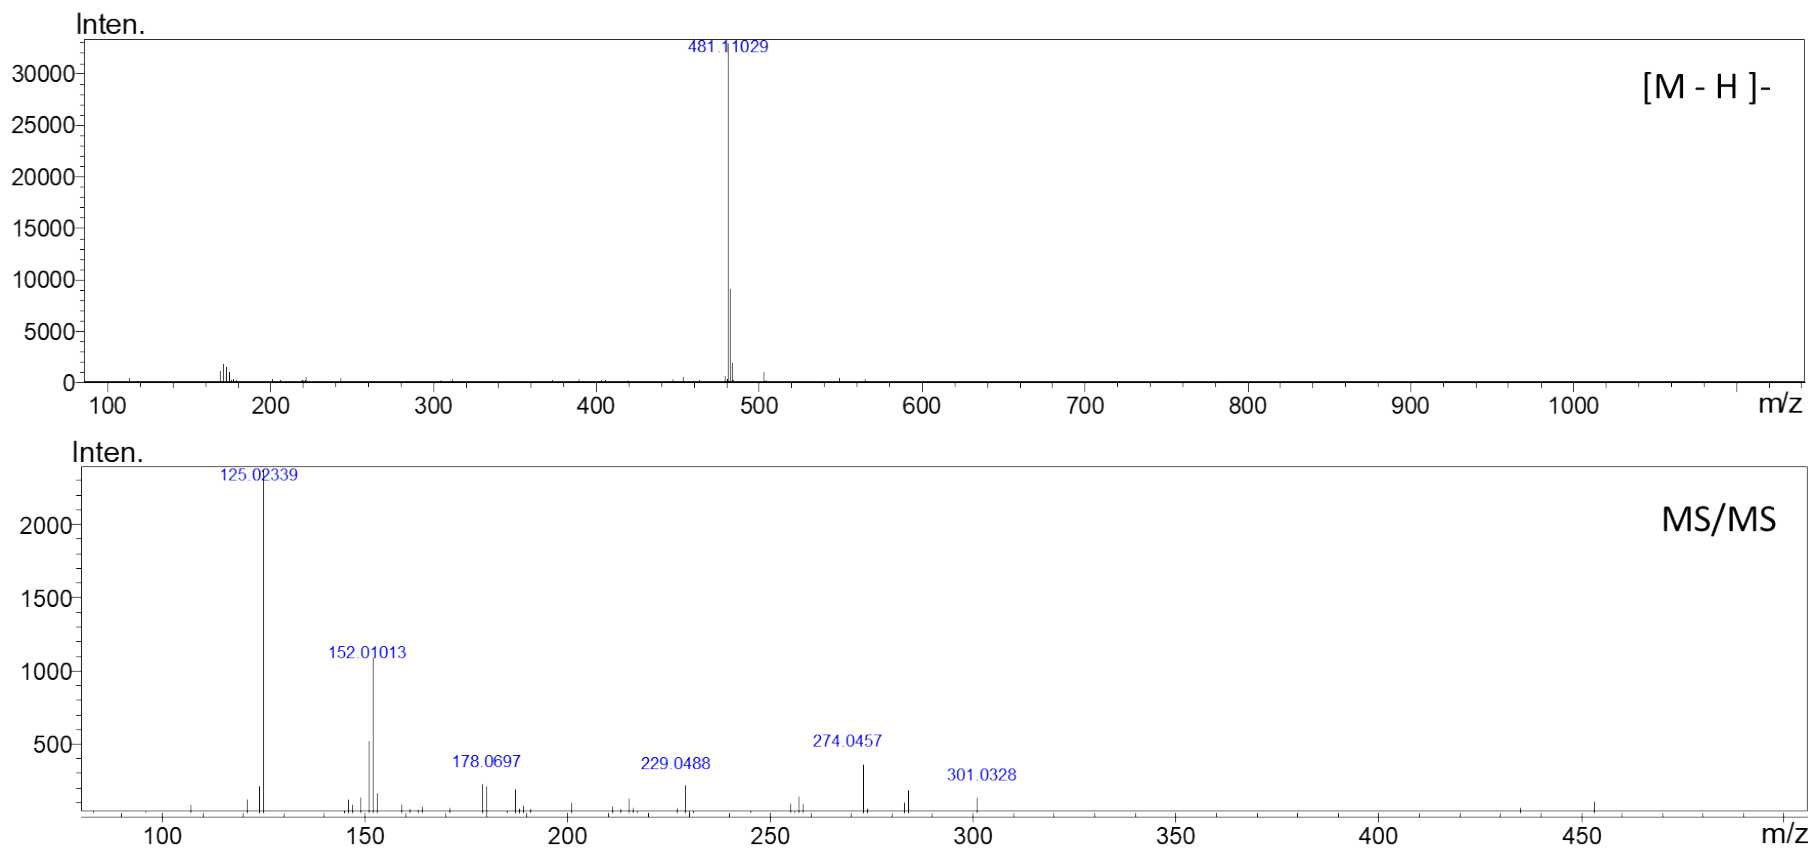

**Figure 14.** Negative ion electrospray HRMS (top panel) and product ion tandem mass spectrum of peak 12 (isosilybin B;  $[M-H]^-$ ) of  $m/z$  481.1102 eluting at 22.26 min

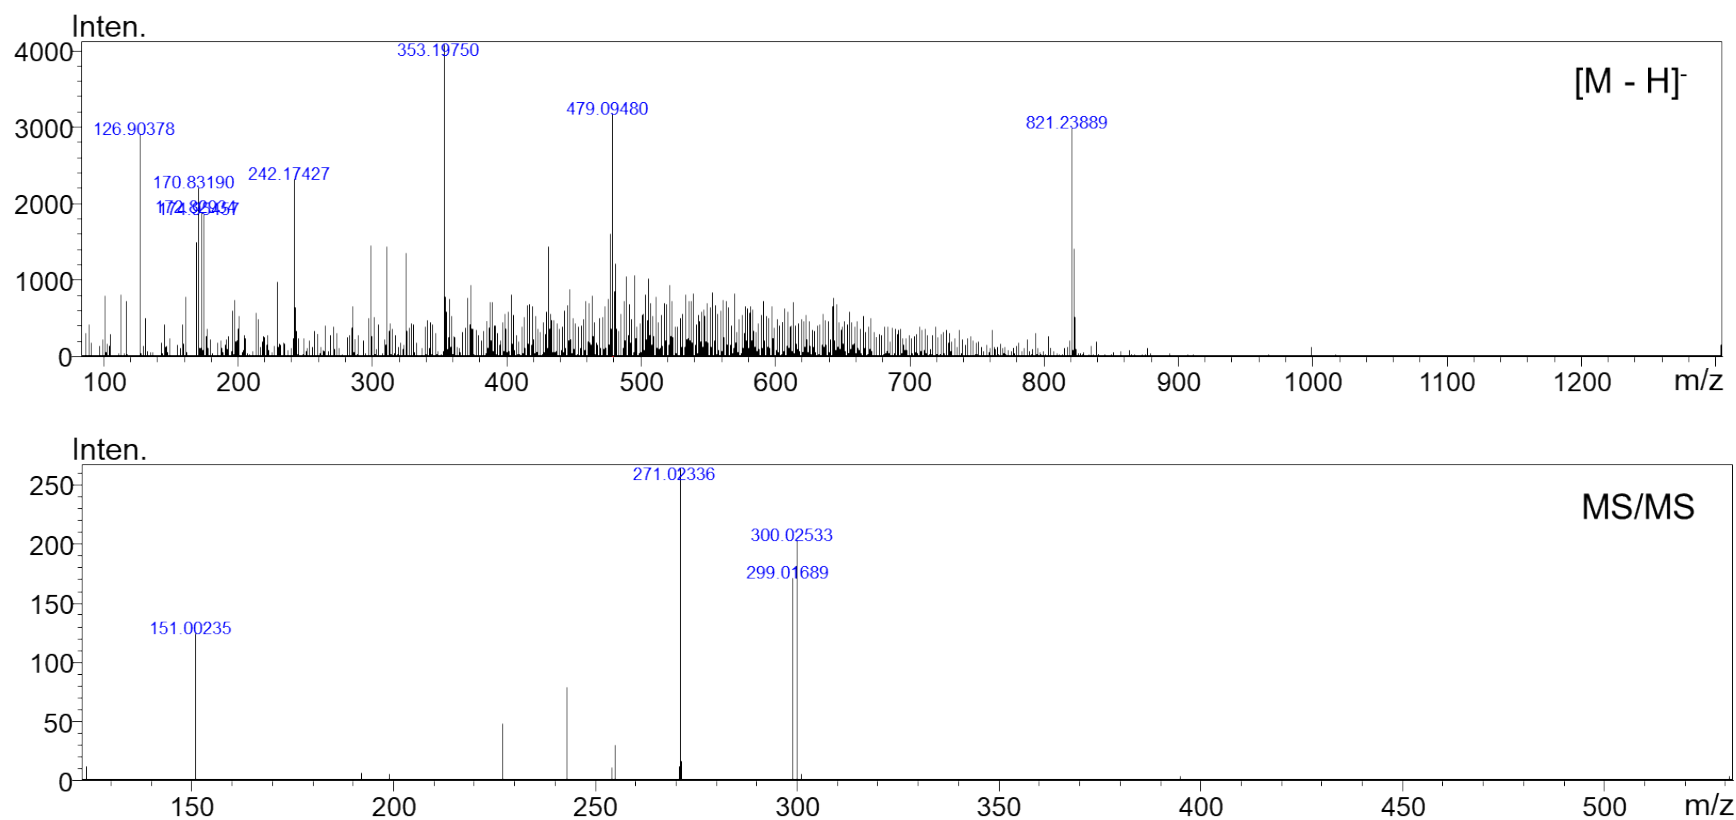

**Figure 15.** Negative ion electrospray HRMS (top panel) and product ion tandem mass spectrum of peak 13 (2,3-dehydrosilybin B; [M-H]<sup>-</sup>) of *m/z* 479.0948 eluting at 25.34 min

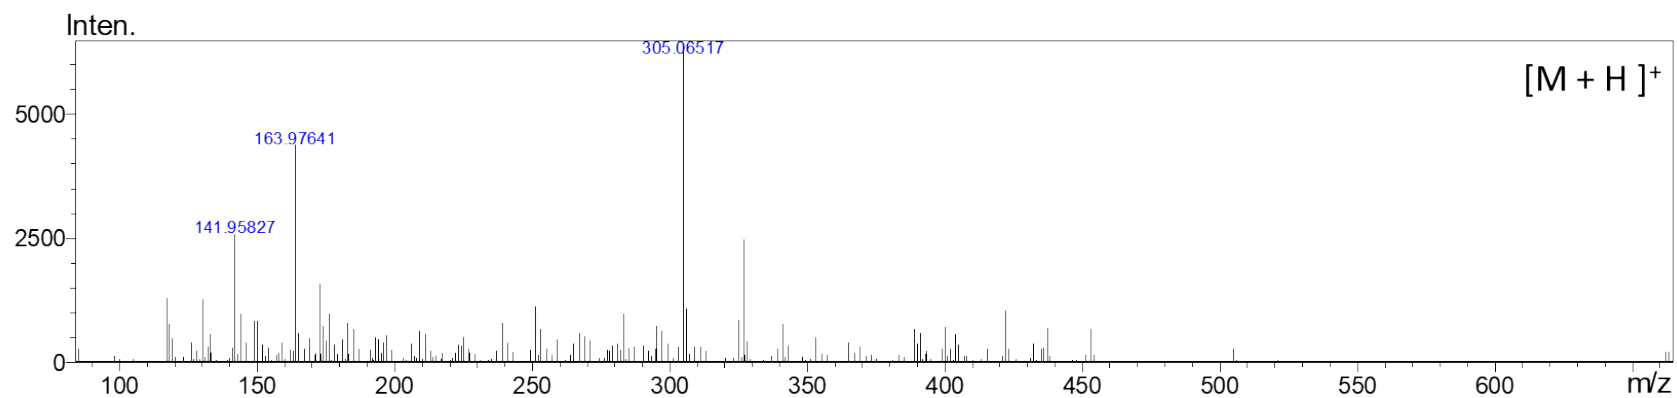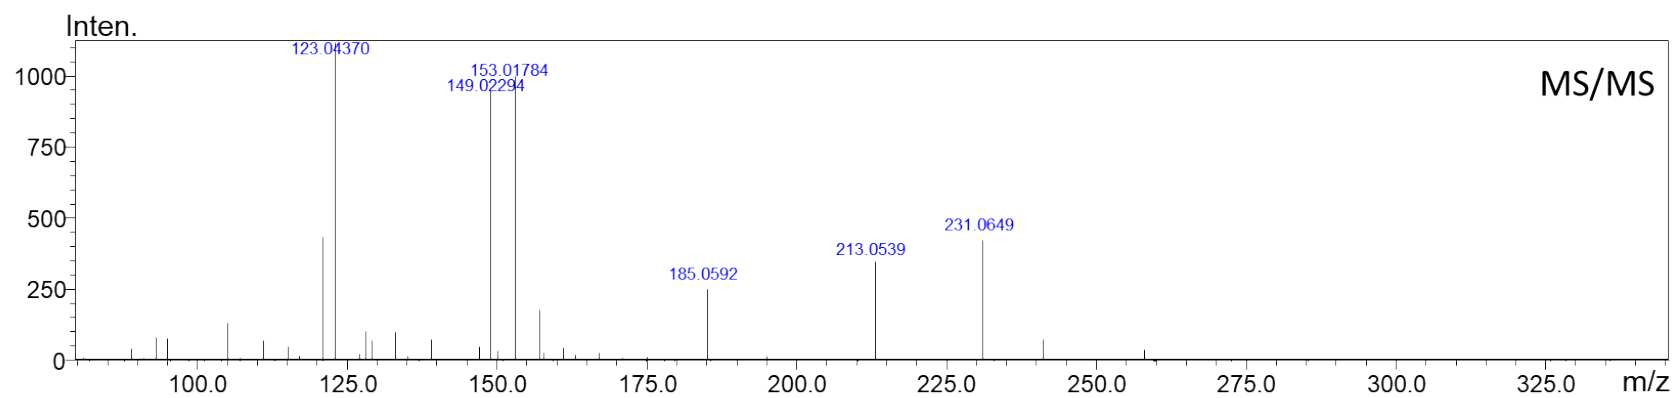

**Figure 16.** Positive ion electrospray HRMS (top panel) and product ion tandem mass spectrum of peak 1 (taxifolin;  $[M+H]^+$ ) of  $m/z$  305.0651 eluting at 10.64 min

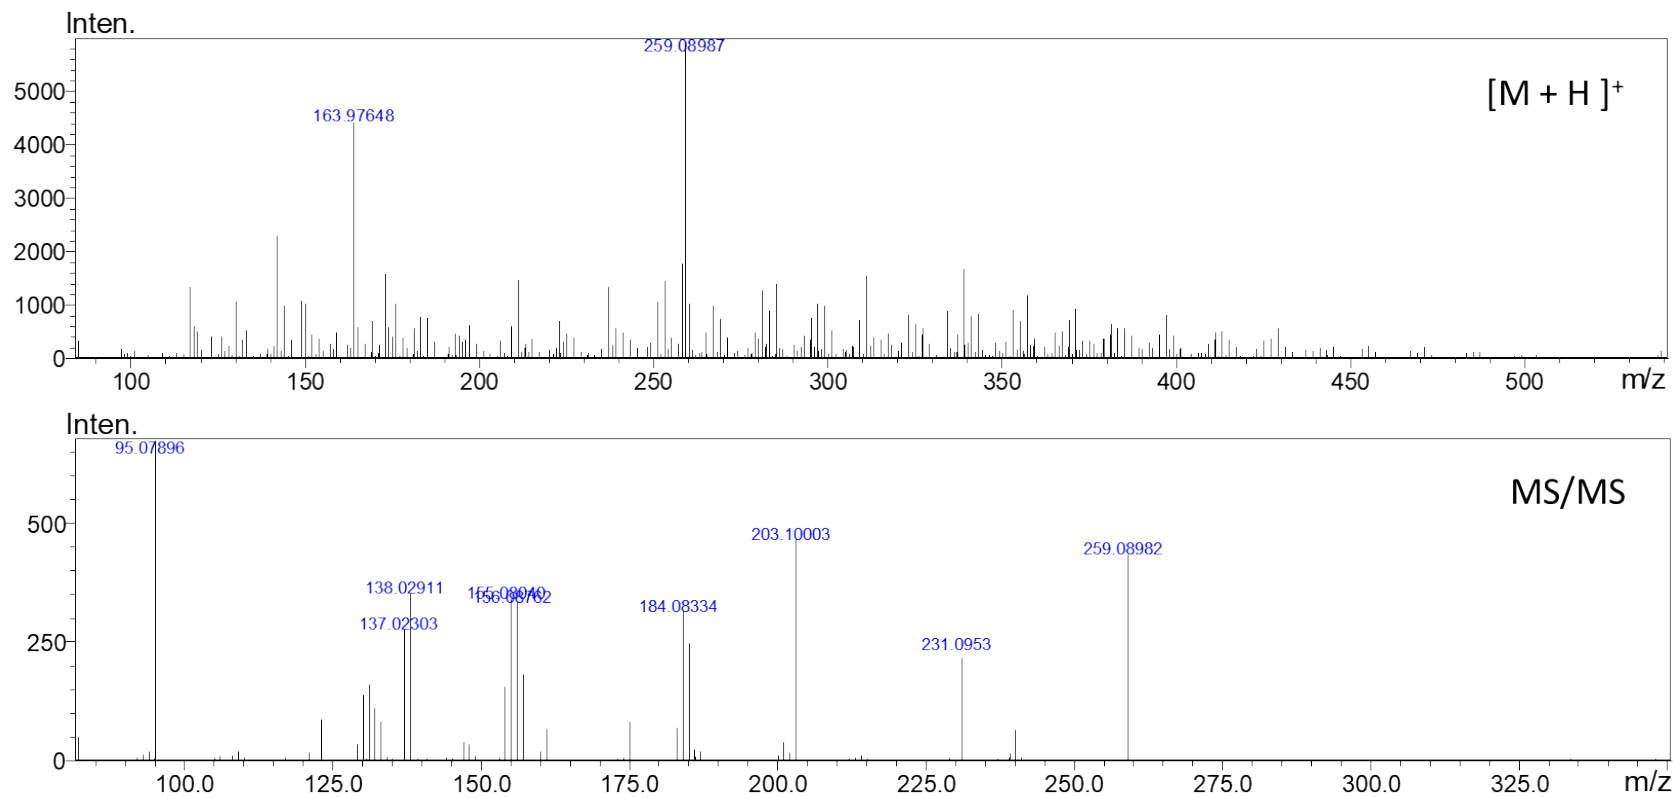

**Figure 17.** Positive ion electrospray HRMS (top panel) and product ion tandem mass spectrum of peak 7 (internal standard,  $d_4$ -daidzein;  $[M+H]^+$ ) of  $m/z$  259.0899 eluting at 16.51 min

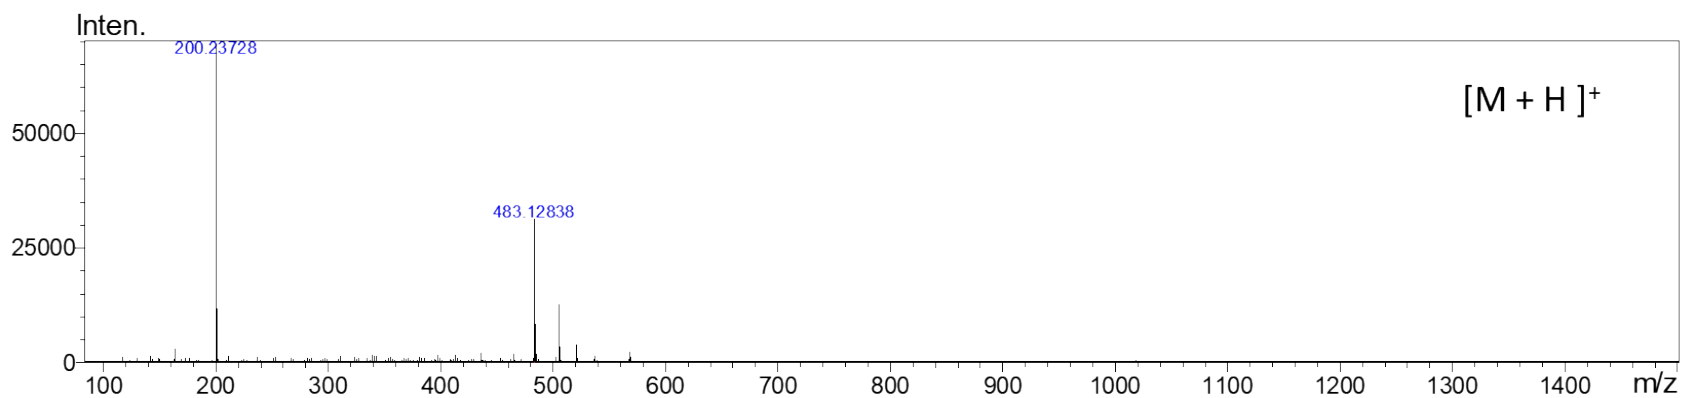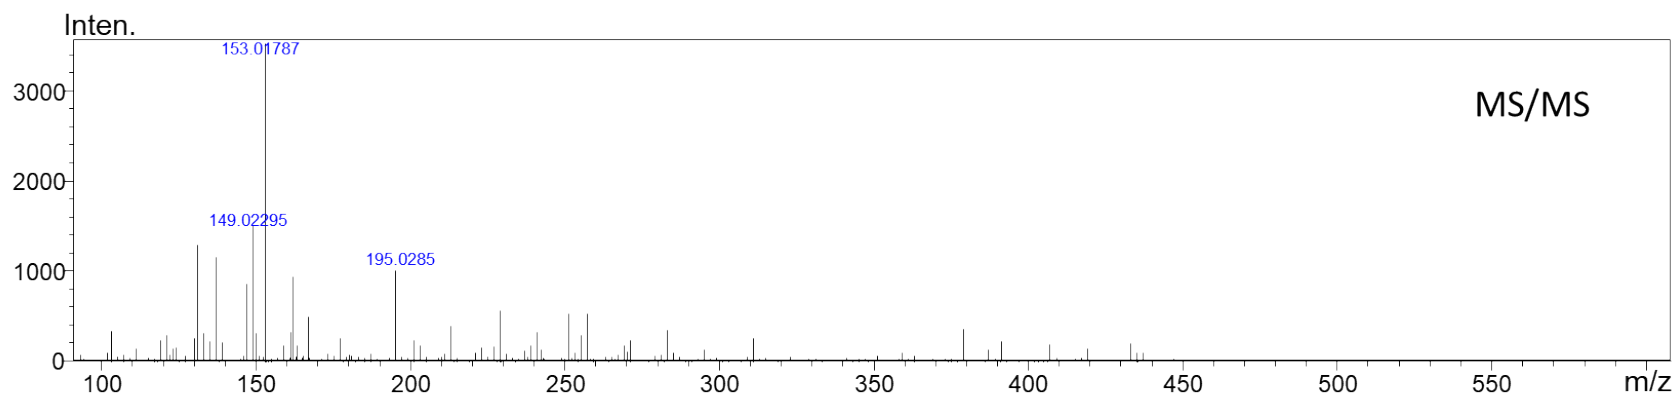

**Figure 18.** Positive ion electrospray HRMS (top panel) and product ion tandem mass spectrum of peak 8 (silybin A;  $[M+H]^+$ ) of  $m/z$  483.1283 eluting at 19.80 min

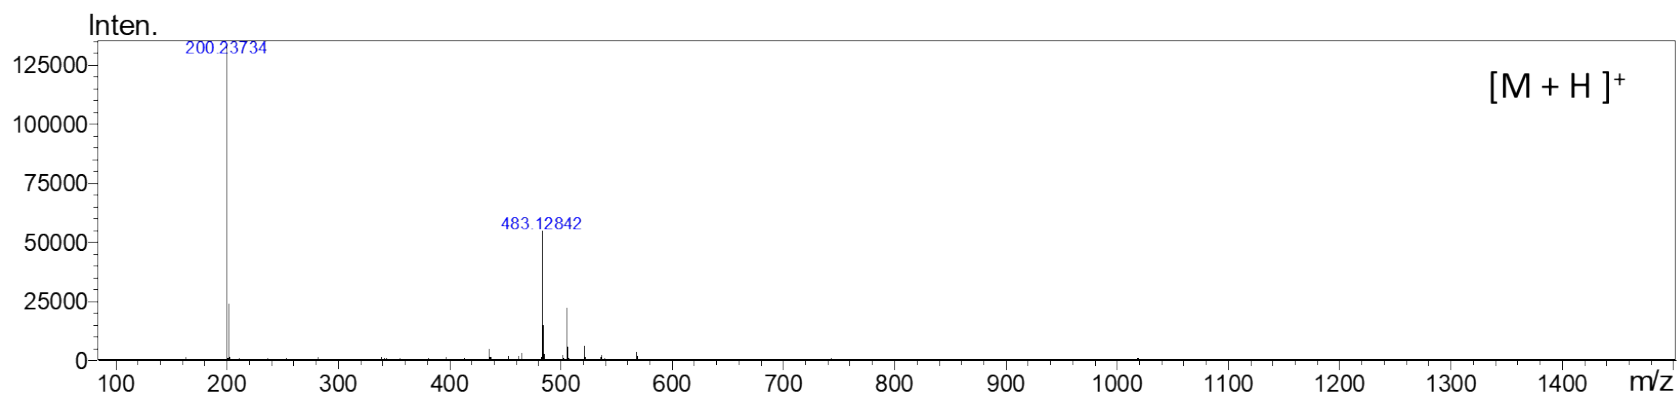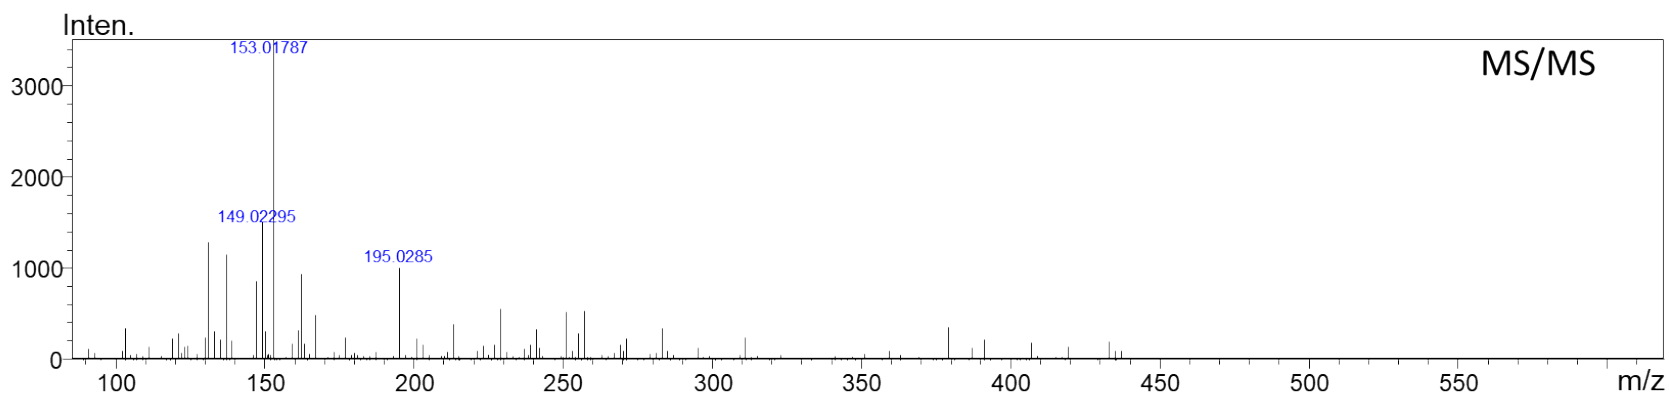

**Figure 19.** Positive ion electrospray HRMS (top panel) and product ion tandem mass spectrum of peak 9 (silybin B;  $[M+H]^+$ ) of  $m/z$  483.1284 eluting at 20.43 min

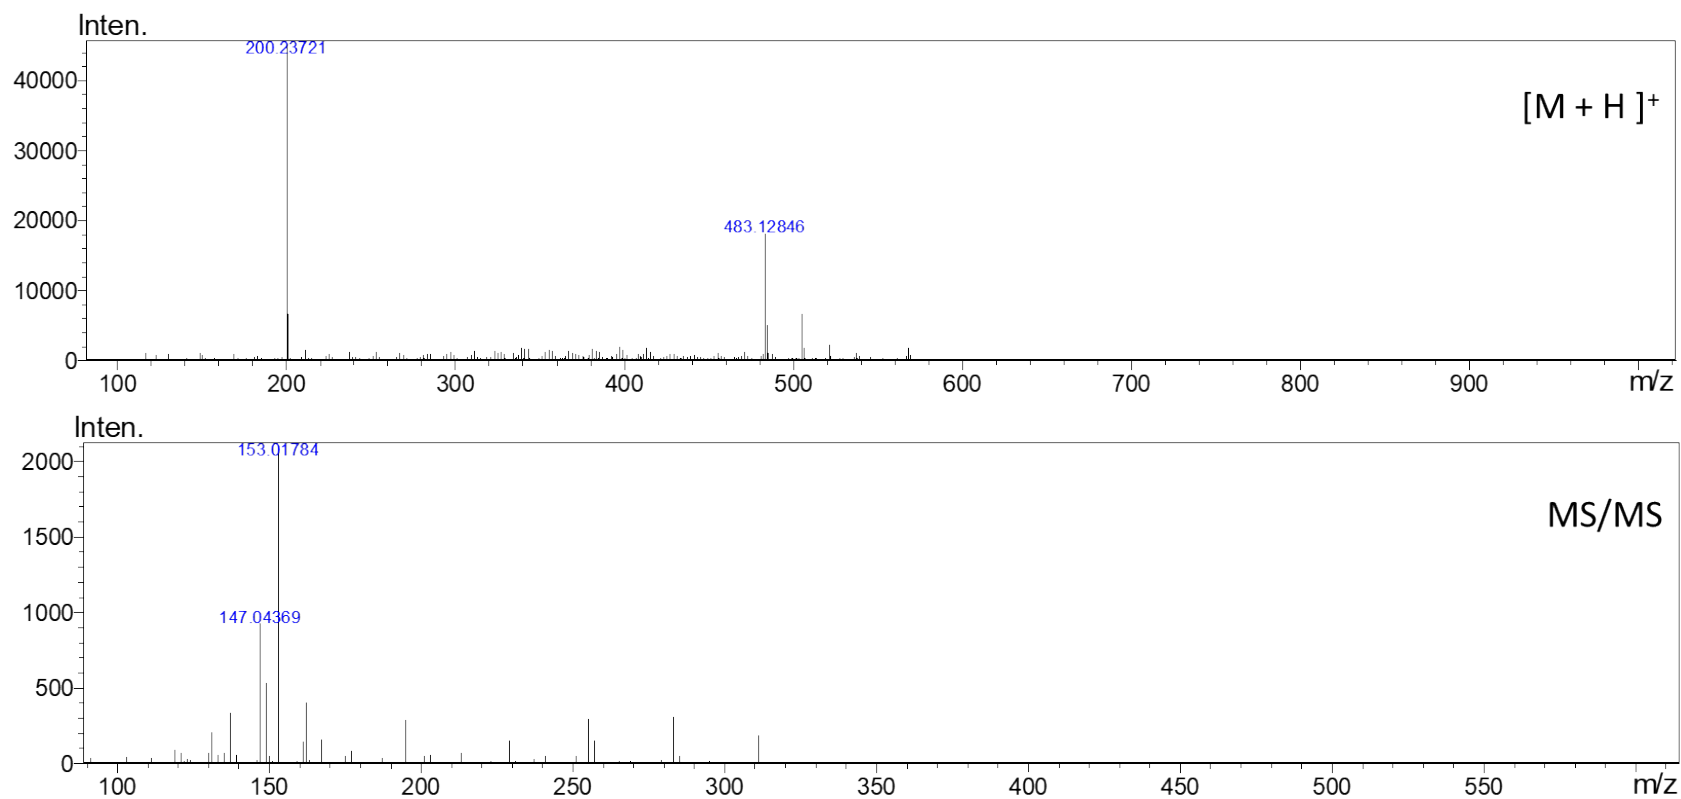

**Figure 20.** Positive ion electrospray HRMS (top panel) and product ion tandem mass spectrum of peak 11 (isosilybin A; [M+H]<sup>+</sup>) of *m/z* 483.1254 eluting at 21.99 min



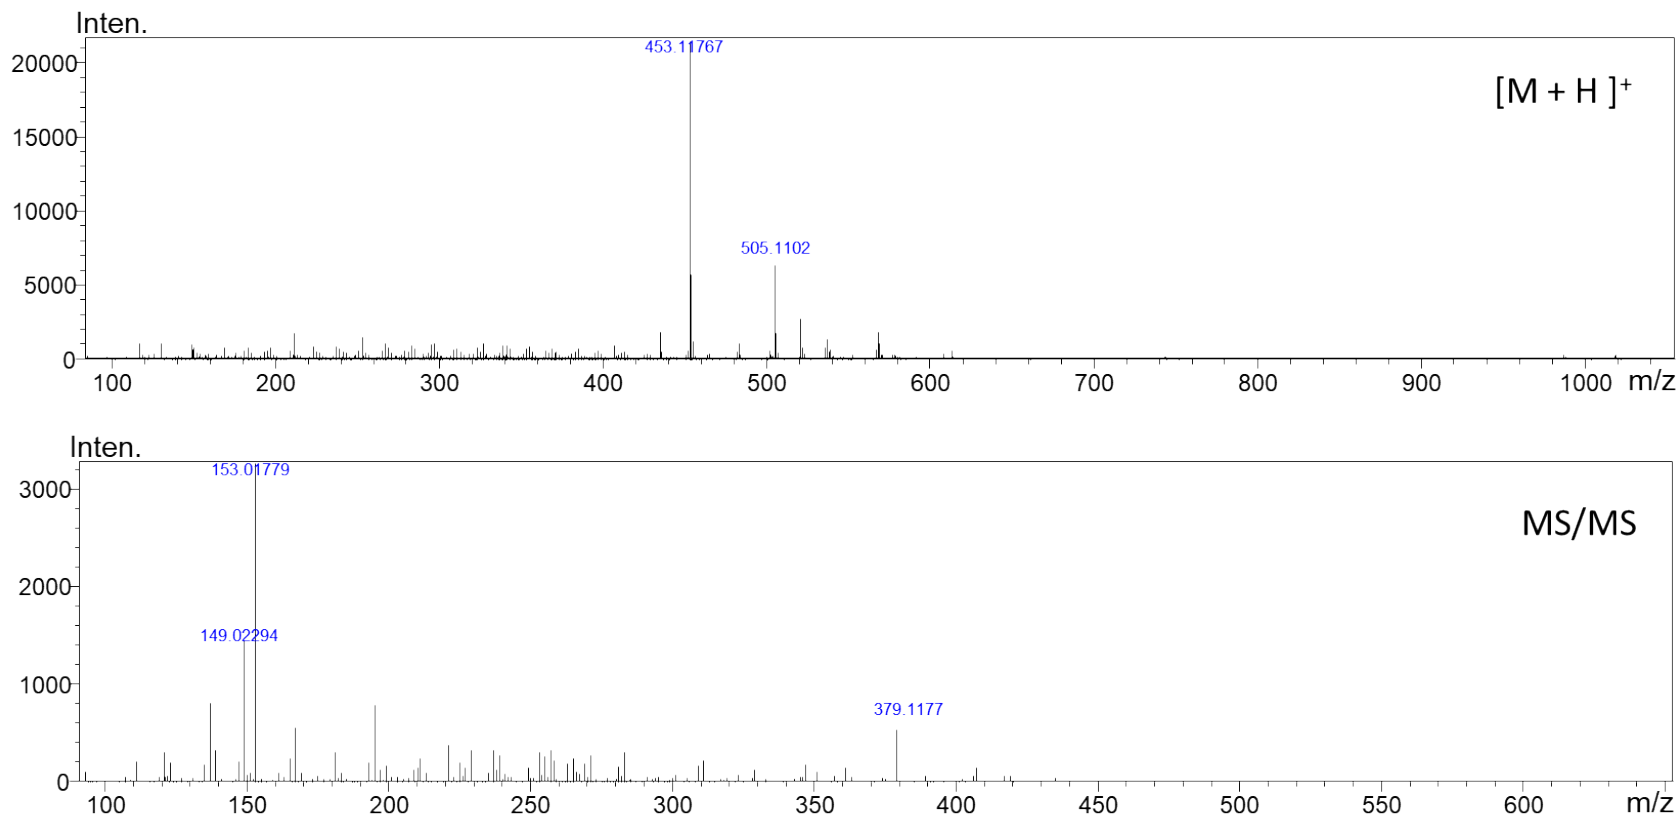

**Figure 21.** Positive ion electrospray HRMS (top panel) and product ion tandem mass spectrum of peak 14 (in-source fragment of silychristin; [M+H]<sup>+</sup>) of *m/z* 453.1176 eluting at 13.59 min

## References

- [1] Csupor, D.; Csorba, A.; Hohmann, J. Recent Advances in the Analysis of Flavonolignans of *Silybum marianum*. *J. Pharm. Biomedical Anal*, **2016**, *130*, 301.
- [2] Lee, J. I.; Hsu, B. H.; Wu, D.; Barrett, J. S. Separation and Characterization of Silybin, Isosilybin, Silydianin and Silychristin in Milk Thistle Extract by Liquid Chromatography–Electrospray Tandem Mass Spectrometry. *J. Chromatogr. A* **2006**, *1116*, 57.
